# Supplementary material for: The Incidence of Epstein-Barr Virus-Positive Diffuse Large B-Cell Lymphoma: A Systematic Review and Meta-Analysis
Source: PubMed Central journal article supplement (PMC8068359; doi:10.3390/cancers13081785), 2021-04-08
Supplement: cancers-13-01785-s001.pdf [file cancers-13-01785-s001.pdf]

**Table S1.** Quality ratings for the included studies on the basis of the Newcastle-Ottawa Scale.

| Reference                      | Design                     | Selection | Comparability | Outcome or Exposure* | Total Score |
|--------------------------------|----------------------------|-----------|---------------|----------------------|-------------|
| Ahn JS et al. 2013             | Cohort                     | 4         | 2             | 3                    | 9           |
| Aladily TN et al. 2019         | Cohort                     | 4         | 0             | 1                    | 5           |
| Beltran BE et al. 2018         | Cohort                     | 4         | 2             | 3                    | 9           |
| Carreras J et al. 2017         | Cohort                     | 4         | 2             | 3                    | 9           |
| Chang ST et al. 2014           | Cohort                     | 4         | 2             | 3                    | 9           |
| Cohen M et al. 2017            | Cohort                     | 4         | 2             | 2                    | 8           |
| Gibson SE et al. 2009          | Cohort                     | 4         | 0             | 1                    | 5           |
| Hong JY et al. 2015            | Secondary analysis         | 4         | 2             | 3                    | 9           |
| Hsueh CY et al. 2019           | Cohort                     | 4         | 2             | 3                    | 9           |
| Hu LY et al. 2017              | Cohort                     | 4         | 2             | 3                    | 9           |
| Keane C et al. 2019            | Cohort                     | 4         | 2             | 3                    | 9           |
| Lu TX et al. 2015              | Cohort                     | 4         | 2             | 3                    | 9           |
| Miyagi S et al. 2020           | Cohort                     | 4         | 2             | 3                    | 9           |
| Monabati A et al. 2016         | Cohort                     | 4         | 2             | 1                    | 7           |
| Naeini YB et al. 2016          | Cohort                     | 3         | 0             | 1                    | 4           |
| Ohashi A et al. 2017           | Cohort                     | 4         | 2             | 3                    | 9           |
| Ok CY et al. 2014              | Cohort                     | 4         | 2             | 3                    | 9           |
| Okamoto A et al. 2017          | Cohort                     | 4         | 2             | 3                    | 9           |
| Ozsan N et al. 2013            | Cohort                     | 4         | 0             | 2                    | 6           |
| Pan Y et al. 2013              | Cohort                     | 4         | 0             | 2                    | 6           |
| Salas MQ et al. 2020           | Cohort                     | 4         | 2             | 3                    | 9           |
| Sato A et al. 2014             | Cohort                     | 4         | 2             | 3                    | 9           |
| Slack GW et al. 2014           | Cohort                     | 4         | 2             | 3                    | 9           |
| Song CG et al. 2015            | Matched case control study | 4         | 2             | 3                    | 9           |
| Stuhlmann-Laeisz C et al. 2016 | Cohort                     | 4         | 0             | 3                    | 7           |
| Tokuyama K et al. 2017         | Cohort                     | 4         | 2             | 3                    | 9           |
| Uccini S et al. 2015           | Cohort                     | 4         | 0             | 3                    | 7           |
| Uner A et al. 2011             | Cohort                     | 4         | 0             | 2                    | 6           |
| Wada N et al. 2011             | Cohort                     | 4         | 0             | 2                    | 6           |
| Xie Y et al. 2014              | Cohort                     | 4         | 0             | 3                    | 7           |
| Ziarkiewicz M et al. 2016      | Cohort                     | 4         | 2             | 3                    | 9           |

Note: rating of study quality: 8–9, very good; 6–7, good; 4–5, satisfactory; 0–3, unsatisfactory.

\*For a case-control study by Song CG et al., the “Exposure” domain was evaluated. Otherwise, the “Outcome” domain was evaluated.
